# Supplementary material for: Adaptation to spindle assembly checkpoint inhibition through the selection of specific aneuploidies
Source: PubMed Central journal article supplement (PMC10111865; doi:10.1101/gad.350182.122), 2023-03-01
Supplement: supp_gad.350182.122_Supplemental_Fig_S3.pdf [file supp_gad.350182.122_Supplemental_Fig_S3.pdf]

**Figure S3**

**A**

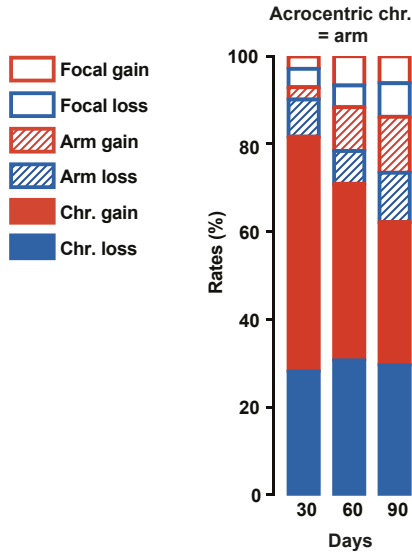

**B**

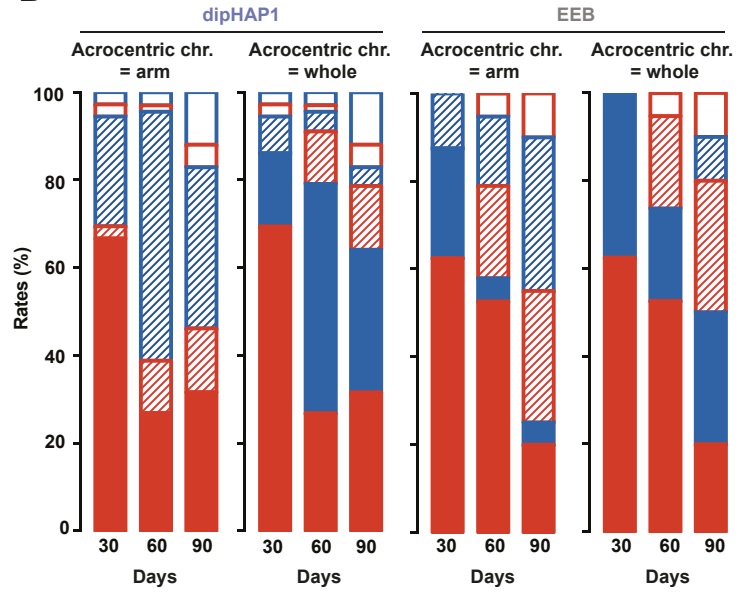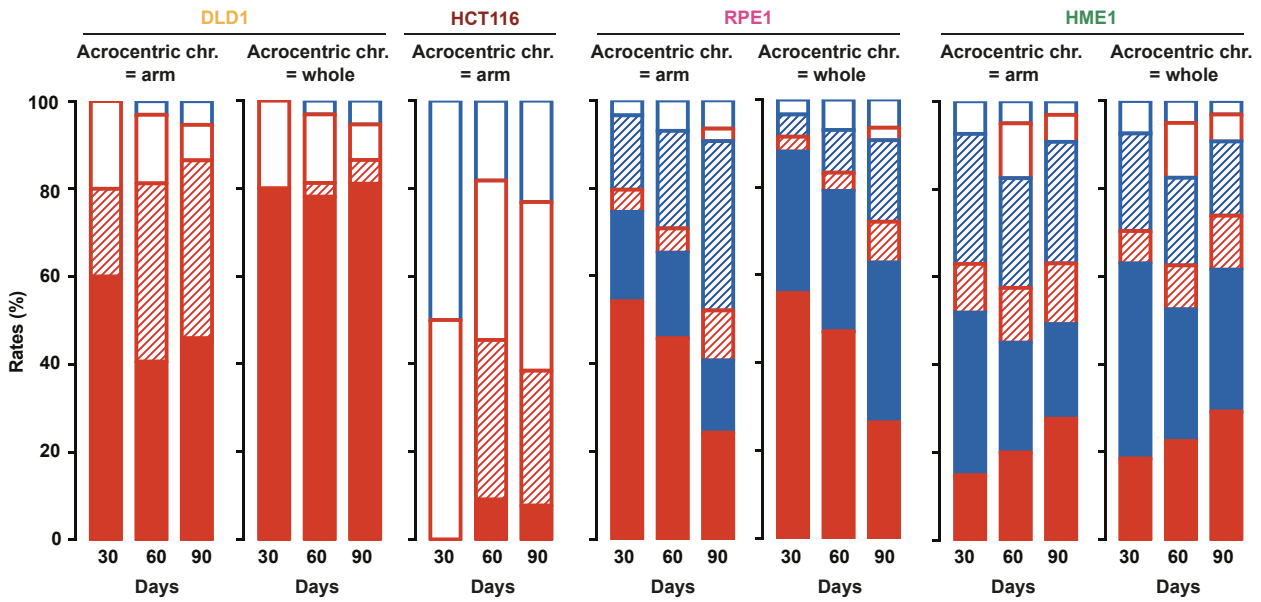

**C**

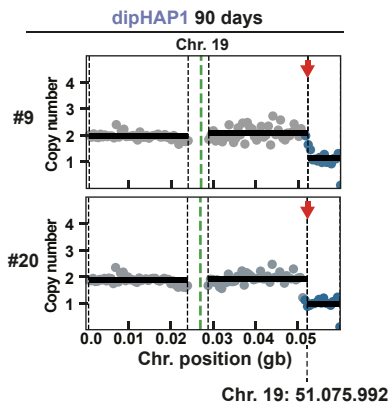

**D**

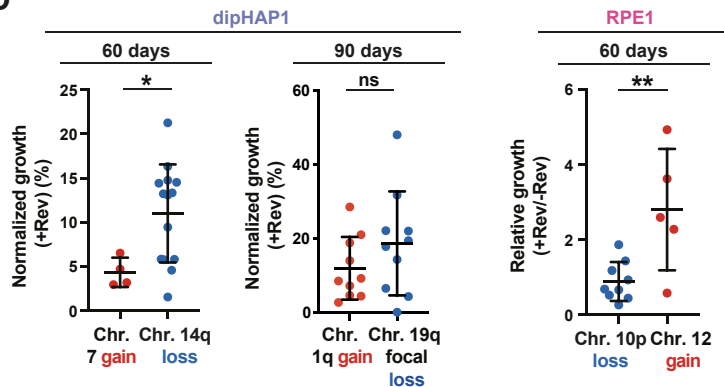

**Figure S3. A,** Relative proportion of types of copy number changes as in Fig. 1E with acrocentric chromosomes considered as whole-chromosomes instead of arms. **B,** Relative proportion of types of copy number changes of the reversine adapted cell populations at 30, 60 and 90 days from each cell line. For acrocentric chromosomes considered as arm or as whole chromosome. **C,** Copy number profiles of two 90 days adapted dipHAP1 cell lines (#9 and #20) with a 7.5 MB focal loss of chr. 19q. **D,** Comparison of the normalized growth with reversine (+Rev) or relative growth (+Rev/-Rev) of 60 or 90 days adapted dipHAP1 and RPE1 populations with the negatively correlated aneuploidies related to Fig. 1G. p-values are from unpaired student's t-test. \* =  $p < 0.05$ , \*\* =  $p < 0.01$ , ns = not significant.
