# Supplementary material for: Adaptation to spindle assembly checkpoint inhibition through the selection of specific aneuploidies
Source: PubMed Central journal article supplement (PMC10111865; doi:10.1101/gad.350182.122), 2023-03-01
Supplement: supp_gad.350182.122_Supplemental_Fig_S4.pdf [file supp_gad.350182.122_Supplemental_Fig_S4.pdf]

**Figure S4**

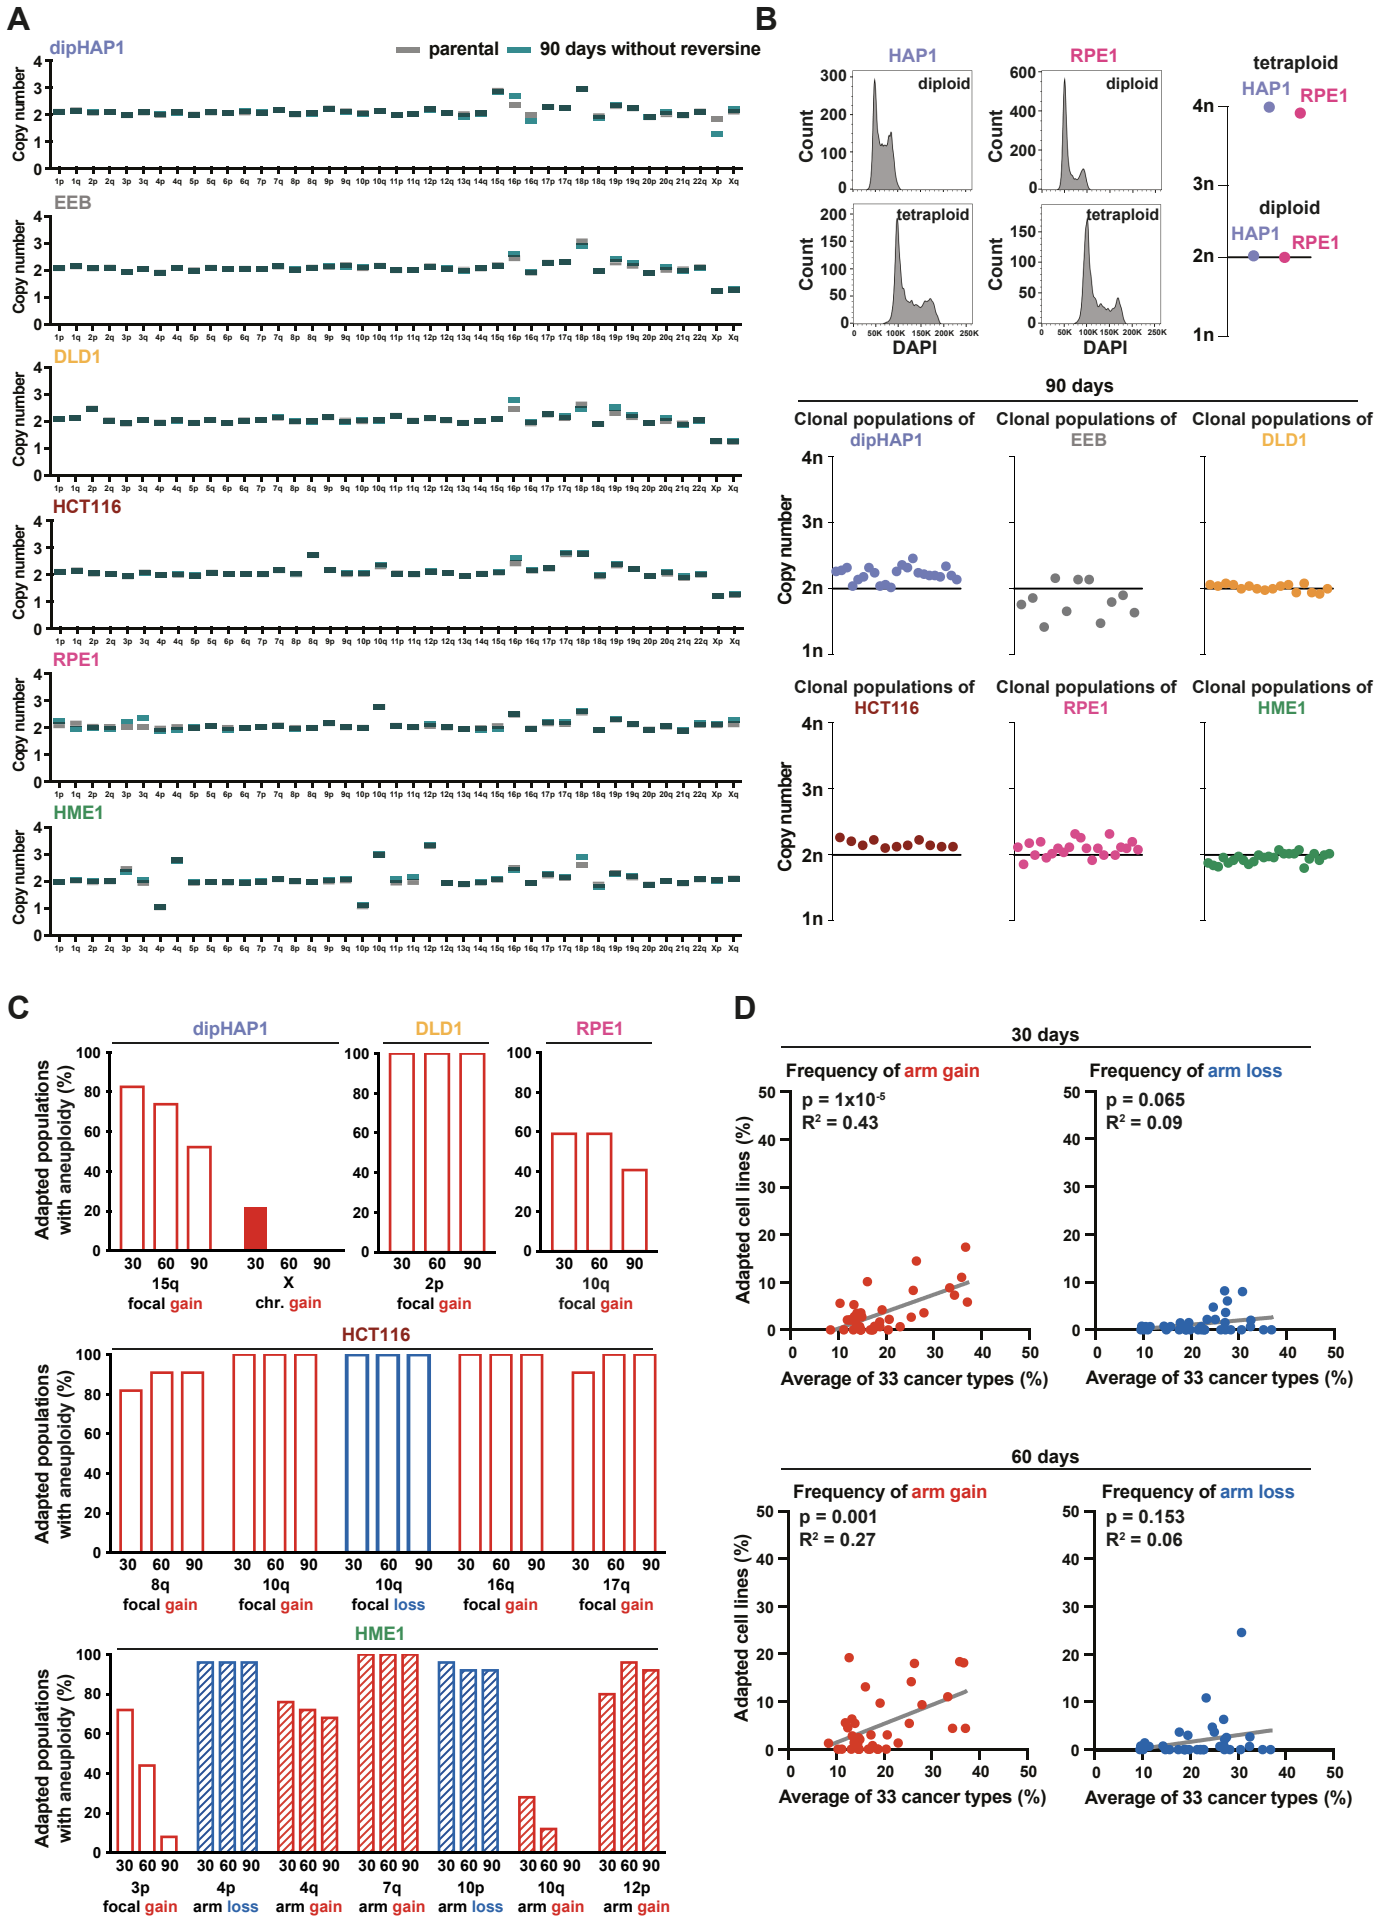

**Figure S4. A,** Genome-wide arm copy numbers of parental cell lines before adaptation (time point zero, grey) and after 90 days of cultivation in the absence of reversine (turquoise). 90 days values are an average of six independently cultivated populations. **B,** HOECHST-based flow cytometry analysis of DNA content of diploid and tetraploid dipHAP1 and RPE1 control cell lines (top). G1 DNA content of the reversine adapted populations of all six cell lines at the 90 days time point (bottom). 10,000 cells were analyzed in each measurement; 1n represents haploid DNA content. **C,** Bar graphs depicting the relative abundance of cell line-specific aneuploidies present at time point zero after 30, 60 and 90 days of reversine adaptation. Bar colors depict type of copy number change as in Fig. 1E. **D,** Correlations between the frequencies of chromosome arm gains (red dots) and losses (blue dots) of reversine adapted cell populations at the 30 days and 60 days time points and 33 different cancer types. The R-squared values and p-values from F-tests are depicted in the graphs.
