# Supplementary material for: Adaptation to spindle assembly checkpoint inhibition through the selection of specific aneuploidies
Source: PubMed Central journal article supplement (PMC10111865; doi:10.1101/gad.350182.122), 2023-03-01
Supplement: supp_gad.350182.122_Supplemental_Fig_S5.pdf [file supp_gad.350182.122_Supplemental_Fig_S5.pdf]

Figure S5

| Cancer type | dipHAP1          |         |                   |         | EEB              |         |                   |         | DLD1             |                   | HCT116           |                   | RPE1             |         |                   |         | HME1             |         |                   |         |
|-------------|------------------|---------|-------------------|---------|------------------|---------|-------------------|---------|------------------|-------------------|------------------|-------------------|------------------|---------|-------------------|---------|------------------|---------|-------------------|---------|
|             | Chromosome gains |         | Chromosome losses |         | Chromosome gains |         | Chromosome losses |         | Chromosome gains | Chromosome losses | Chromosome gains | Chromosome losses | Chromosome gains |         | Chromosome losses |         | Chromosome gains |         | Chromosome losses |         |
|             | R squared        | P value | R squared         | P value | R squared        | P value | R squared         | P value | R squared        | P value           | R squared        | P value           | R squared        | P value | R squared         | P value | R squared        | P value | R squared         | P value |
| ACC         | 0.0437           | 0.2013  | 0.0639            | 0.1205  | 0.0886           | 0.0657  | 0.1226            | 0.0289  | 0.0001           | 0.9551            | 0.0276           | 0.3119            | 0.1750           | 0.008   | 0.0208            | 0.381   | 0.0386           | 0.2308  | 0.0311            | 0.2828  |
| BLCA        | 0.3448           | <0.0001 | 0.0002            | 0.924   | 0.0325           | 0.2719  | 0.0001            | 0.9476  | 0.0011           | 0.8446            | 0.0002           | 0.9334            | 0.2473           | 0.0013  | 0.0006            | 0.8791  | 0.2670           | 0.0008  | 0.0032            | 0.7304  |
| BRCA        | 0.5194           | <0.0001 | 0.0100            | 0.5456  | 0.1399           | 0.019   | 0.0511            | 0.1663  | 0.0001           | 0.9458            | 0.0010           | 0.8484            | 0.2061           | 0.0037  | 0.0040            | 0.7007  | 0.1470           | 0.016   | 0.1514            | 0.0144  |
| CESC        | 0.2404           | 0.0015  | 0.0000            | 0.9791  | 0.0427           | 0.2068  | 0.0583            | 0.1386  | 0.0108           | 0.5283            | 0.0063           | 0.6323            | 0.2048           | 0.0038  | 0.0067            | 0.6206  | 0.2151           | 0.0029  | 0.0010            | 0.8488  |
| CHOL        | 0.2268           | 0.0022  | 0.0725            | 0.0973  | 0.0774           | 0.0864  | 0.0732            | 0.0957  | 0.0320           | 0.2759            | 0.0007           | 0.8702            | 0.2066           | 0.0037  | 0.0630            | 0.1233  | 0.0916           | 0.0611  | 0.0640            | 0.1203  |
| COAD        | 0.4028           | <0.0001 | 0.0003            | 0.9122  | 0.0326           | 0.2714  | 0.0008            | 0.8669  | 0.0046           | 0.6833            | 0.0033           | 0.7279            | 0.2861           | 0.0005  | 0.0076            | 0.5966  | 0.2543           | 0.0011  | 0.0376            | 0.2372  |
| DLBC        | 0.0112           | 0.5206  | 0.0093            | 0.5593  | 0.0000           | 0.992   | 0.0012            | 0.8361  | 0.0071           | 0.6089            | 0.0106           | 0.5324            | 0.0006           | 0.8829  | 0.0195            | 0.3961  | 0.0025           | 0.7647  | 0.0001            | 0.965   |
| ESCA        | 0.5252           | <0.0001 | 0.0060            | 0.6401  | 0.0339           | 0.262   | 0.0228            | 0.3592  | 0.0115           | 0.5168            | 0.0033           | 0.7275            | 0.3202           | 0.0002  | 0.0333            | 0.2659  | 0.2191           | 0.0027  | 0.0261            | 0.3262  |
| GBM         | 0.0566           | 0.1446  | 0.0198            | 0.3933  | 0.0015           | 0.8142  | 0.0082            | 0.5832  | 0.0027           | 0.7517            | 0.0044           | 0.6873            | 0.0064           | 0.6289  | 0.0291            | 0.2994  | 0.0697           | 0.1044  | 0.0405            | 0.2193  |
| HNSC        | 0.4417           | <0.0001 | 0.0011            | 0.8398  | 0.1361           | 0.0208  | 0.0144            | 0.4675  | 0.0105           | 0.5344            | 0.0292           | 0.2983            | 0.3752           | <0.0001 | 0.0215            | 0.373   | 0.1436           | 0.0173  | 0.0182            | 0.4128  |
| KICH        | 0.0483           | 0.1786  | 0.0006            | 0.8871  | 0.0205           | 0.3848  | 0.0417            | 0.2124  | 0.0739           | 0.094             | 0.0009           | 0.8525            | 0.0823           | 0.0766  | 0.1281            | 0.0253  | 0.0438           | 0.2008  | 0.0115            | 0.5159  |
| KIRC        | 0.0252           | 0.334   | 0.0532            | 0.1576  | 0.0476           | 0.1823  | 0.0000            | 0.9885  | 0.0171           | 0.428             | 0.0425           | 0.208             | 0.1295           | 0.0244  | 0.0091            | 0.5636  | 0.0296           | 0.2951  | 0.0000            | 0.9915  |
| KIRP        | 0.0024           | 0.7662  | 0.0737            | 0.0946  | 0.0607           | 0.1306  | 0.0055            | 0.6523  | 0.0179           | 0.4168            | 0.0395           | 0.2253            | 0.0063           | 0.6299  | 0.0528            | 0.1594  | 0.0714           | 0.1002  | 0.0027            | 0.7545  |
| LAML        | 0.3706           | <0.0001 | 0.0154            | 0.4524  | 0.2668           | 0.0008  | 0.0019            | 0.7932  | 0.0064           | 0.6275            | 0.0344           | 0.2585            | 0.0686           | 0.1073  | 0.0187            | 0.407   | 0.0183           | 0.4111  | 0.0051            | 0.6645  |
| LGG         | 0.0688           | 0.1068  | 0.1121            | 0.0373  | 0.0337           | 0.263   | 0.0328            | 0.2701  | 0.0055           | 0.6533            | 0.0053           | 0.6611            | 0.0010           | 0.8463  | 0.0098            | 0.548   | 0.0027           | 0.7531  | 0.0362            | 0.2458  |
| LIHC        | 0.4301           | <0.0001 | 0.0192            | 0.3999  | 0.2230           | 0.0024  | 0.0424            | 0.2088  | 0.0018           | 0.7959            | 0.0117           | 0.512             | 0.1801           | 0.0071  | 0.0040            | 0.7029  | 0.0243           | 0.3433  | 0.0535            | 0.1568  |
| LUAD        | 0.2924           | 0.0004  | 0.0229            | 0.3576  | 0.0280           | 0.3091  | 0.0511            | 0.1664  | 0.0004           | 0.9058            | 0.0232           | 0.3545            | 0.1255           | 0.0269  | 0.0085            | 0.5756  | 0.0187           | 0.4063  | 0.0619            | 0.1266  |
| LUSC        | 0.1901           | 0.0055  | 0.0250            | 0.3362  | 0.0439           | 0.2006  | 0.0595            | 0.1346  | 0.0047           | 0.6792            | 0.0416           | 0.213             | 0.2127           | 0.0031  | 0.0300            | 0.2919  | 0.1601           | 0.0116  | 0.0580            | 0.1396  |
| MESO        | 0.0471           | 0.1844  | 0.1036            | 0.0457  | 0.0143           | 0.4677  | 0.1037            | 0.0456  | 0.0000           | 0.9906            | 0.0695           | 0.105             | 0.0351           | 0.2537  | 0.0150            | 0.4571  | 0.0006           | 0.88    | 0.0445            | 0.1973  |
| OV          | 0.3151           | 0.0002  | 0.0120            | 0.5074  | 0.0284           | 0.305   | 0.0534            | 0.157   | 0.0054           | 0.6564            | 0.0028           | 0.7497            | 0.2837           | 0.0005  | 0.0043            | 0.6921  | 0.2579           | 0.001   | 0.0768            | 0.0875  |
| PAAD        | 0.3254           | 0.0001  | 0.0074            | 0.6029  | 0.0416           | 0.2128  | 0.0002            | 0.9315  | 0.0048           | 0.6751            | 0.0011           | 0.8383            | 0.1517           | 0.0143  | 0.0445            | 0.1975  | 0.0623           | 0.1255  | 0.0000            | 0.9888  |
| PCPG        | 0.0822           | 0.0767  | 0.0051            | 0.6646  | 0.0566           | 0.1448  | 0.0088            | 0.5692  | 0.0012           | 0.837             | 0.0023           | 0.7722            | 0.0177           | 0.4193  | 0.0103            | 0.5387  | 0.0011           | 0.841   | 0.0301            | 0.2912  |
| PRAD        | 0.3250           | 0.0002  | 0.0105            | 0.5356  | 0.1076           | 0.0415  | 0.0263            | 0.3236  | 0.0117           | 0.5128            | 0.0004           | 0.8993            | 0.0749           | 0.0919  | 0.0011            | 0.8441  | 0.0007           | 0.8734  | 0.0891            | 0.0649  |
| READ        | 0.3529           | <0.0001 | 0.0011            | 0.8415  | 0.0289           | 0.3008  | 0.0001            | 0.9499  | 0.0143           | 0.4684            | 0.0003           | 0.9217            | 0.2781           | 0.0006  | 0.0042            | 0.6936  | 0.3088           | 0.0002  | 0.0297            | 0.2938  |
| SARC        | 0.0679           | 0.1091  | 0.0676            | 0.11    | 0.1817           | 0.0068  | 0.1141            | 0.0355  | 0.0491           | 0.1752            | 0.0659           | 0.1147            | 0.0862           | 0.0697  | 0.0439            | 0.2005  | 0.0522           | 0.1617  | 0.3538            | <0.0001 |
| SKCM        | 0.4060           | <0.0001 | 0.0009            | 0.8547  | 0.0536           | 0.156   | 0.0000            | 0.9719  | 0.0089           | 0.568             | 0.0098           | 0.5486            | 0.1200           | 0.0308  | 0.0180            | 0.4156  | 0.0712           | 0.1005  | 0.0320            | 0.2762  |
| STAD        | 0.6561           | <0.0001 | 0.0004            | 0.9035  | 0.0886           | 0.0657  | 0.0054            | 0.6566  | 0.0155           | 0.4509            | 0.0002           | 0.94              | 0.4253           | <0.0001 | 0.0040            | 0.7018  | 0.2504           | 0.0012  | 0.0001            | 0.9621  |
| TGCT        | 0.1349           | 0.0214  | 0.0163            | 0.4393  | 0.0216           | 0.3723  | 0.0800            | 0.081   | 0.0133           | 0.4847            | 0.0112           | 0.5207            | 0.0601           | 0.1325  | 0.0030            | 0.7397  | 0.0086           | 0.5738  | 0.0573            | 0.1424  |
| THCA        | 0.0189           | 0.4038  | 0.0002            | 0.9408  | 0.0080           | 0.5873  | 0.0013            | 0.8297  | 0.0051           | 0.665             | 0.0316           | 0.2789            | 0.0061           | 0.6357  | 0.0001            | 0.9547  | 0.0010           | 0.8479  | 0.0031            | 0.7351  |
| THYM        | 0.2622           | 0.0009  | 0.0050            | 0.6675  | 0.1248           | 0.0274  | 0.0921            | 0.0604  | 0.0598           | 0.1335            | 0.0184           | 0.4102            | 0.0835           | 0.0744  | 0.1751            | 0.008   | 0.0065           | 0.6262  | 0.0767            | 0.088   |
| UCEC        | 0.4962           | <0.0001 | 0.0043            | 0.6913  | 0.0667           | 0.1123  | 0.0307            | 0.2859  | 0.0180           | 0.4155            | 0.0081           | 0.5852            | 0.1371           | 0.0203  | 0.0066            | 0.6242  | 0.0639           | 0.1206  | 0.0948            | 0.0566  |
| UCS         | 0.2902           | 0.0004  | 0.0179            | 0.4162  | 0.0158           | 0.4455  | 0.0281            | 0.3079  | 0.0167           | 0.4337            | 0.0058           | 0.6448            | 0.1236           | 0.0282  | 0.0015            | 0.8147  | 0.2542           | 0.0011  | 0.0600            | 0.1328  |
| UVM         | 0.3838           | <0.0001 | 0.0150            | 0.458   | 0.1739           | 0.0083  | 0.0106            | 0.5321  | 0.0024           | 0.7651            | 0.0005           | 0.888             | 0.1267           | 0.0262  | 0.0122            | 0.5038  | 0.0028           | 0.7485  | 0.0001            | 0.9499  |

Figure S5. Simple linear regression correlation analysis of chromosome arm gains and losses of each adapted cell line with TCGA cancer types. The respective R-squared and p-values are depicted. Green shaded cells highlight significant correlations.
