# Supplementary material for: Adaptation to spindle assembly checkpoint inhibition through the selection of specific aneuploidies
Source: PubMed Central journal article supplement (PMC10111865; doi:10.1101/gad.350182.122), 2023-03-01
Supplement: supp_gad.350182.122_Supplemental_Fig_S8.pdf [file supp_gad.350182.122_Supplemental_Fig_S8.pdf]

**Figure S8**

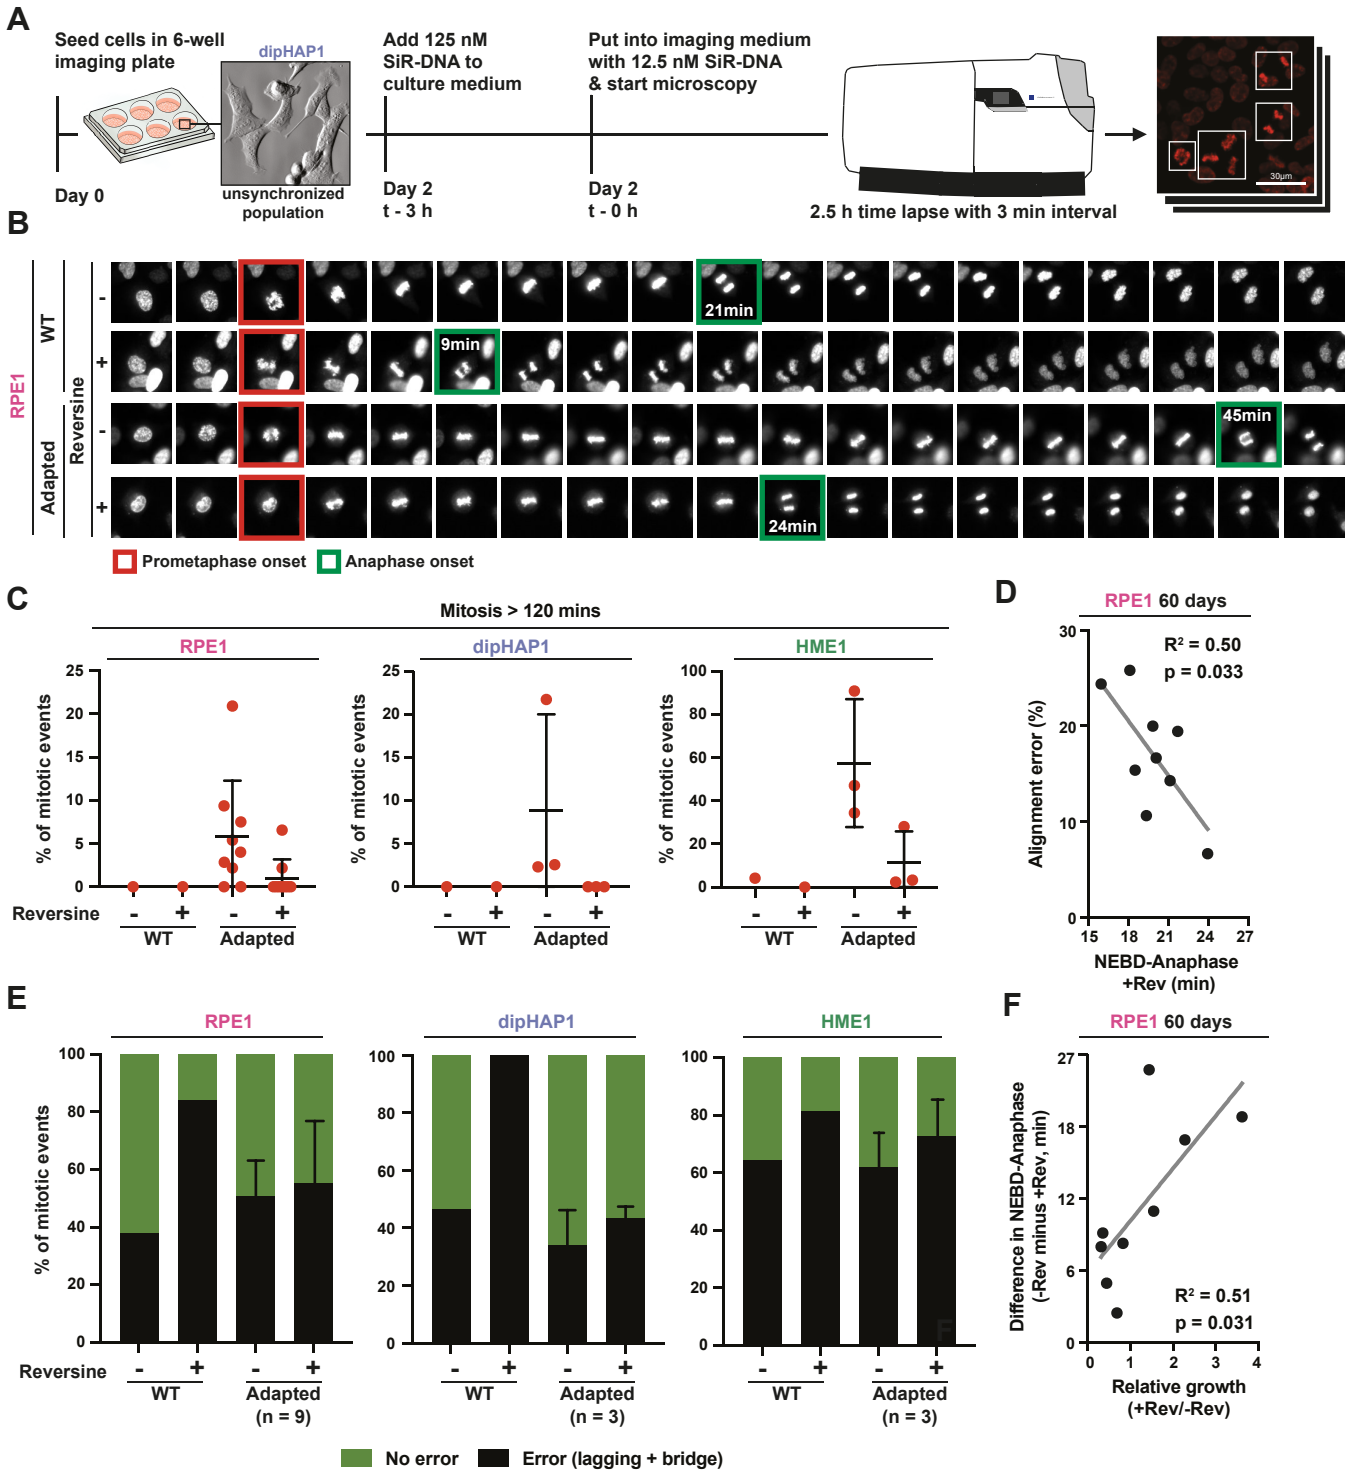

**Figure S8. A**, Scheme of the SiR-DNA staining procedure followed by live cell time-lapse imaging. **B**, Full mitotic time-lapse with and without reversine of the parental and adapted RPE1 cells shown in Fig. 4A. **C**, Percentage of mitotic events that lasted longer than 120 min, related to Fig. 4A,B. Each dot represents the mean percentage of an individual adapted population of the respective cell line or the respective parental cell line (WT). **D**, Correlation between the percentage of mitotic events with alignment defects directly preceding anaphase (y-axis) and the NEBD to anaphase duration in reversine (x-axis) of nine 60 days adapted RPE1 population, related to Fig. 4A,C. **E**, Quantification of anaphase errors (bridges and lagging chromosomes) with and without reversine for the unadapted parental cell lines and the adapted cell populations from RPE1 (time point 60 days), dipHAP1 (time point 90 days) and HME1 (time point 90 days). Error bars depict SD between the adapted populations (n depicted in graph) of the respective cell line. **F**, Correlation between the difference in NEBD to anaphase timing with and without reversine (y-axis) and the relative growth (+Rev/-Rev) of the nine 60 days adapted RPE1 populations (x-axis), related to Fig 4A. Analyzed adapted populations are the same as in Fig. 4A-D. p-values are from F-tests.
