# Supplementary material for: Adaptation to spindle assembly checkpoint inhibition through the selection of specific aneuploidies
Source: PubMed Central journal article supplement (PMC10111865; doi:10.1101/gad.350182.122), 2023-03-01
Supplement: supp_gad.350182.122_Supplemental_Fig_S9.pdf [file supp_gad.350182.122_Supplemental_Fig_S9.pdf]

## Figure S9

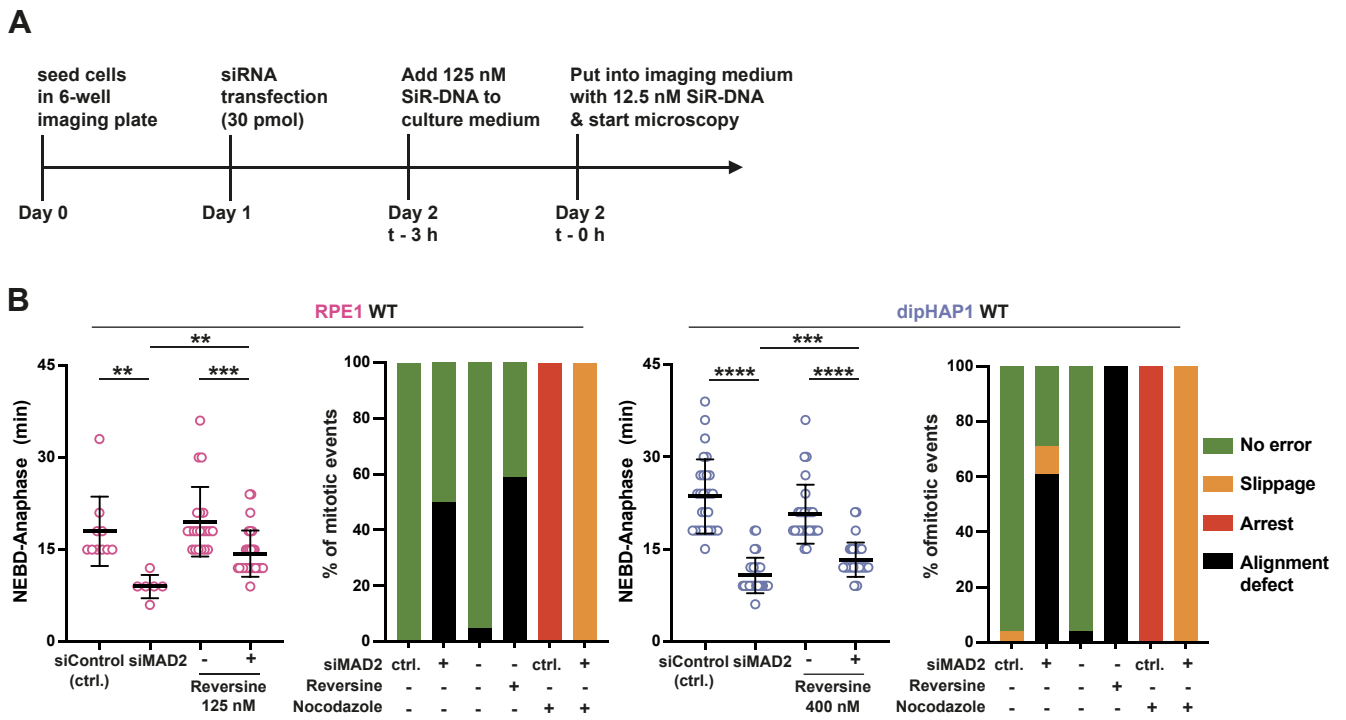

**Figure S9. A**, Experimental design of the siRNA experiment targeting MAD2 combined with the SiR-DNA live cell imaging set-up. **B**, Quantification of NEBD to anaphase durations and mitotic errors of RPE1 and dipHAP1 unadapted parental (WT) cell lines. Left: Time from NEBD to anaphase in min of WT cell lines transfected either with the indicated siRNA or with and without reversine. Right: Quantification of mitotic errors under the indicated conditions. Green = no error, orange = slippage, red = mitotic arrest, black = alignment defect. p-values are from unpaired student's t-tests, \*\* =  $p < 0.01$ , \*\*\* =  $p < 0.001$ , \*\*\*\* =  $p < 0.0001$ .
