# Supplementary material for: Adaptation to spindle assembly checkpoint inhibition through the selection of specific aneuploidies
Source: PubMed Central journal article supplement (PMC10111865; doi:10.1101/gad.350182.122), 2023-03-01
Supplement: supp_gad.350182.122_Supplemental_Fig_S10.pdf [file supp_gad.350182.122_Supplemental_Fig_S10.pdf]

**Figure S10**

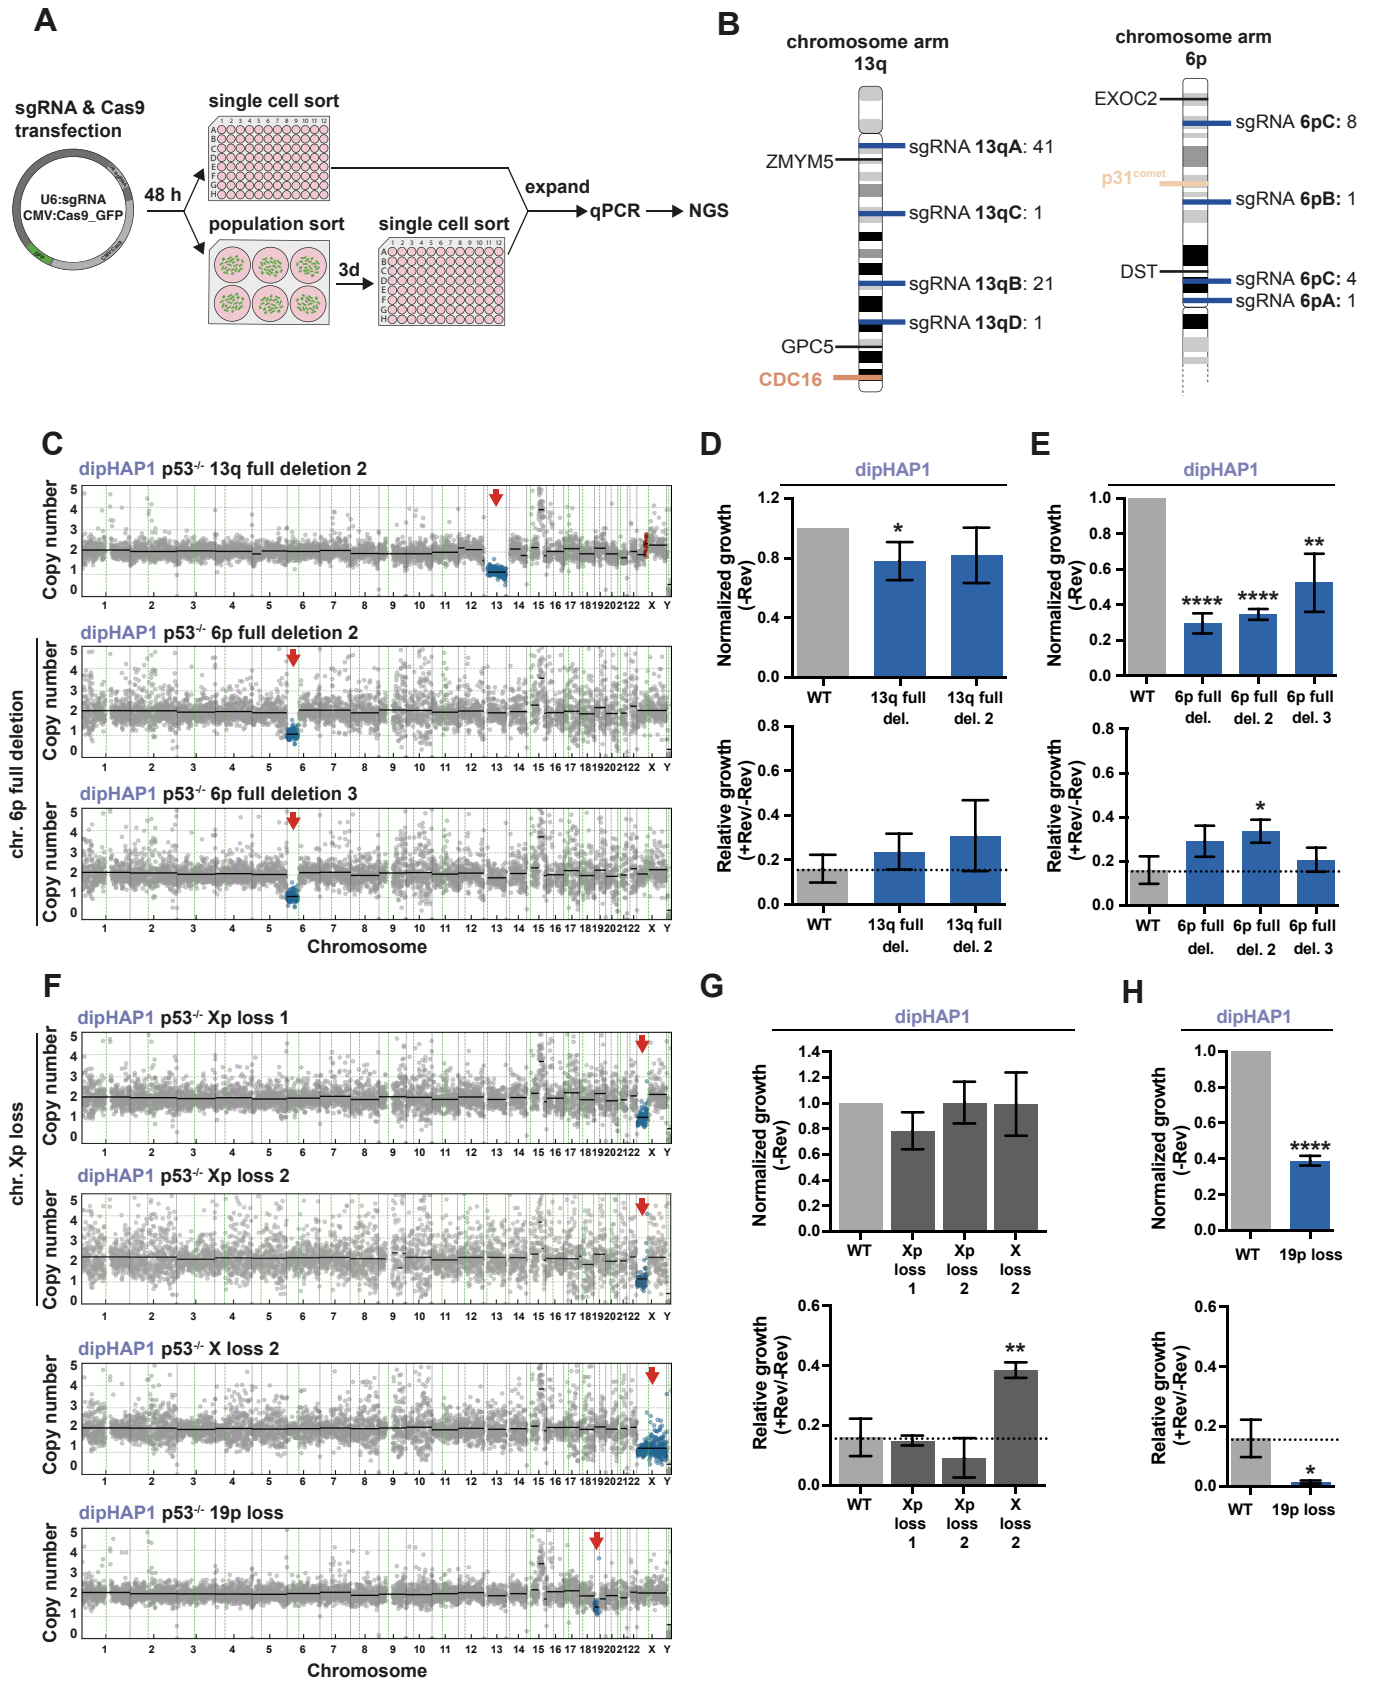

**Figure S10. A**, Illustration of the experimental procedure to engineer whole and partial chromosome deletions. **B**, Schematic depiction of sgRNA target sites on chromosome arm 13q and 6p (blue lines). Numbers after the semicolon denote the number of target sites on the chromosome arm. The qPCR primer binding locations that were used to screen for successful deletion cell lines are depicted with black lines and the gene name. **C**, Copy number profiles of additional engineered chromosome 13q (13q full del. 2) and 6p deletions (6p full del. 2, 3) in dipHAP1 cells. **D,E** Normalized and relative growth of the additional 13q and 6p deletion cell lines measured by colony formation assays. Bars depict mean  $\pm$  SD. Dotted line represents mean growth of dipHAP1 WT cell line in reversine.  $n = 3$ . **F**, Copy number profiles of the dipHAP1 Xp (Xp loss 1 and 2), additional X loss (X loss 2) and 19p loss cell lines. **G,H** Normalized and relative growth of the dipHAP1 Xp, X loss and 19p loss cell lines measured by colony formation assays.  $n = 3$ . p-values are from unpaired student's t-tests, \* =  $p < 0.05$ , \*\* =  $p < 0.01$ , \*\*\*\* =  $p < 0.0001$ . Where not indicated, the p-value was greater than 0.05.
