# Supplementary material for: Adaptation to spindle assembly checkpoint inhibition through the selection of specific aneuploidies
Source: PubMed Central journal article supplement (PMC10111865; doi:10.1101/gad.350182.122), 2023-03-01
Supplement: supp_gad.350182.122_Supplemental_Fig_S15.pdf [file supp_gad.350182.122_Supplemental_Fig_S15.pdf]

Figure S15

A

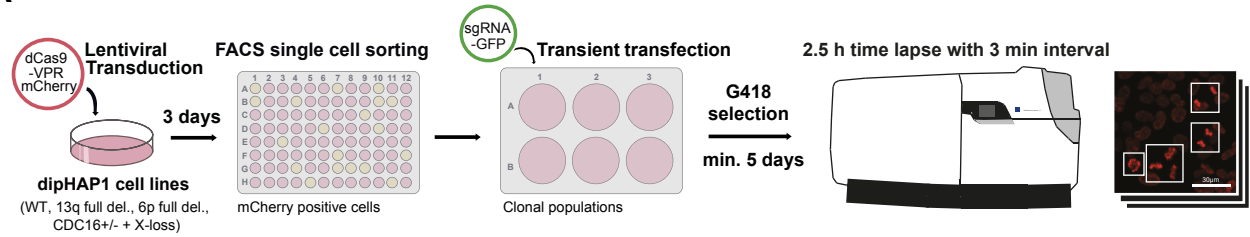

B

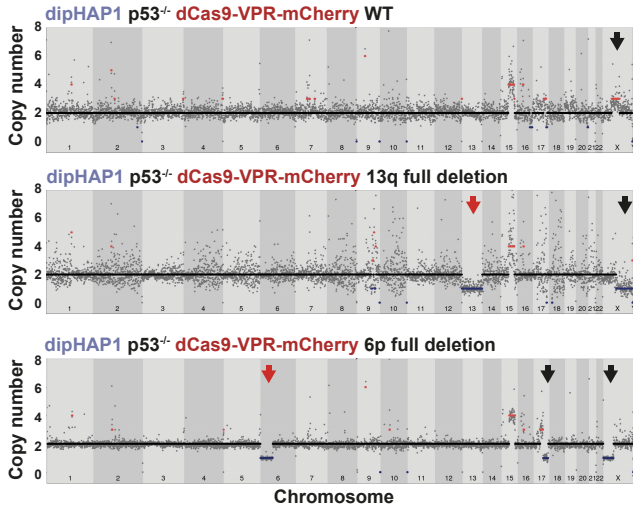

C

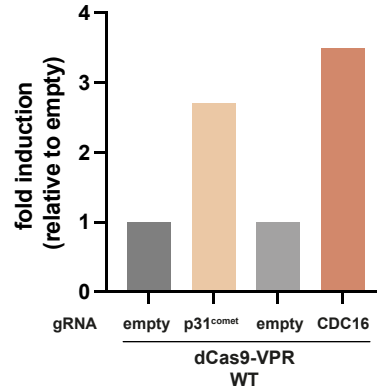

D

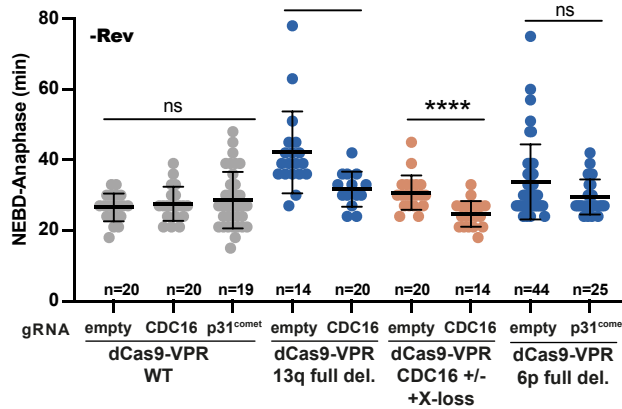

E

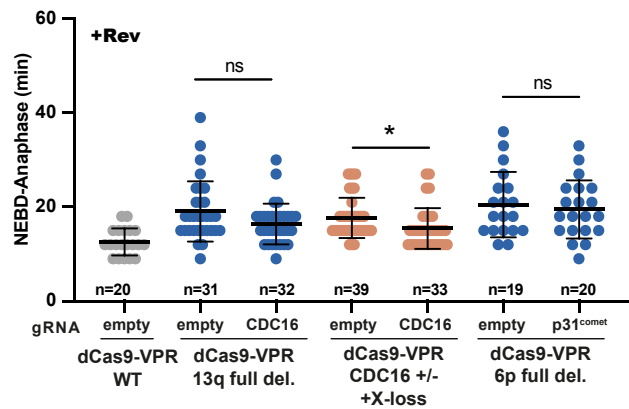

F

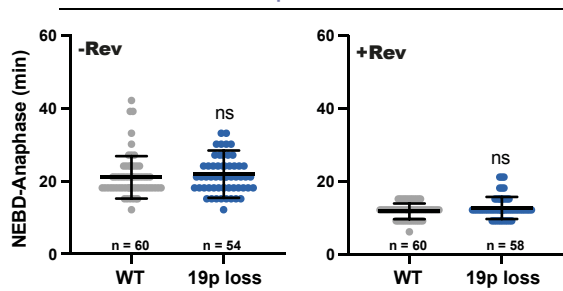

G

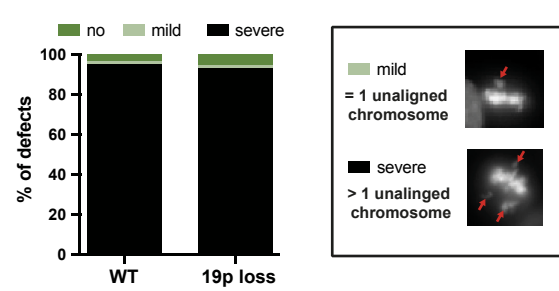

**Figure S15. A**, Schematic overview of the dCas9-VPR CRISPR activation (CRISPRa) of *CDC16* and *p31<sup>comet</sup>*. **B**, Copy number profiles of the lentivirally integrated dCas9-VPR-mCherry cell lines. The 13q full del. and 6p full del. cell lines from Fig. 5A,B were used for integration of the dCas9-VPR-mCherry construct. During the integration process the cell clones acquired secondary copy number changes which are highlighted with black arrows in the profiles, engineered aneuploidies are highlighted with red arrows. **C**, RT-qPCR of the overexpression of *p31<sup>comet</sup>* and *CDC16* in the dCas9-VPR-mCherry WT cell line. n = 1. Fold induction of *p31<sup>comet</sup>* and *CDC16* is normalized to the empty vector control (empty). GAPDH was used as the reference gene. **D**, Duration from NEBD-anaphase in min for the dipHAP1 dCas9-VPR-mCherry overexpression cell lines without (-Rev), (n = 14-20 mitoses), N = 1, dCas9-VPR 6p full del. + empty: N = 2, and **E**, with reversine (+Rev), (n = 20-39 mitoses), N = 1, dCas9-VPR 13q full del. and *CDC16*+/- + X-loss: N = 2. The addition of the respective gRNAs for induction of CRISPRa (*CDC16*, *p31<sup>comet</sup>*) or the empty vector control (empty) is depicted below the graph. **F**, Duration from NEBD-anaphase in min for the dipHAP1 19p loss cell line without (-Rev), (n = 58-60 mitoses), and with reversine (+Rev), (n = 54-60 mitoses). N = 3. **G**, Quantification of no (dark green), mild (one unaligned chromosome, light green) or severe (multiple unaligned chromosomes, black) alignment defect of the analyzed mitoses from **F**. Example images for the categorization of mitoses into mild (one unaligned chromosome) or severe (multiple unaligned chromosomes) alignment defects. p-values are from unpaired student's t-tests, \* = p<0.05, \*\* = p<0.01, \*\*\* = p<0.001, \*\*\*\* = p<0.0001, ns = not significant.
