# Supplementary material for: Adaptation to spindle assembly checkpoint inhibition through the selection of specific aneuploidies
Source: PubMed Central journal article supplement (PMC10111865; doi:10.1101/gad.350182.122), 2023-03-01
Supplement: supp_gad.350182.122_Supplemental_Tables_16.01.pdf [file supp_gad.350182.122_Supplemental_Tables_16.01.pdf]

## Supplemental Tables

### **Adaptation to spindle assembly checkpoint inhibition through the selection of specific aneuploidies**

Manuel Alonso Y Adell<sup>1\*</sup>, Tamara C. Klockner<sup>1\*</sup>, Rudolf Höfler<sup>1</sup>, Lea Wallner<sup>1</sup>, Julia Schmid<sup>1</sup>, Ana Markovic<sup>1</sup>, Anastasiia Martyniak<sup>1</sup>, Christopher S. Campbell<sup>1@</sup>

<sup>1</sup>Department of Chromosome Biology, Max Perutz Labs, University of Vienna, Vienna Biocenter (VBC), A-1030 Vienna, Austria

\*: Authors contributed equally

@: Corresponding author

Email: [christopher.campbell@univie.ac.at](mailto:christopher.campbell@univie.ac.at)

Phone: +43-1-4277-74418

Fax: +43-1-4277-9562

Address: Dr. Bohr-Gasse 9/5, A-1030 Vienna, Austria

Key words: Aneuploidy Patterns – Chromosomal Instability – Spindle Assembly Checkpoint – Drug Resistance Mechanisms – MPS1

| Cell line                     | Tissue                         | Phenotype  | Sex    | Culture Medium                                                                                       | Source                                                 |
|-------------------------------|--------------------------------|------------|--------|------------------------------------------------------------------------------------------------------|--------------------------------------------------------|
| <b>hTERT-RPE1</b>             | Retina epithelial              | Adherent   | Female | DMEM (Sigma-Aldrich)<br>+ 2 mmol L-Glutamine (Gibco)<br>+ 1mM Natrium-Pyruvate (Sigma-Aldrich)       | I. M. Cheeseman (University of California, USA)        |
| <b>hTERT-HME1</b>             | Mammary gland epithelial       | Adherent   | Female | MEBM (Lonza)<br>+ 2 mmol L-Glutamine (Gibco)<br>+ 1mM Natrium-Pyruvate (Sigma-Aldrich)               | Evercyte (Cat#: CHT-044-0236)                          |
| <b>DLD1</b>                   | Colorectal cancer              | Adherent   | Male   | RPMI-1640 (ATCC) (Sigma-Aldrich)                                                                     | M. Baccarini (Max Perutz Labs, Austria)                |
| <b>HCT116</b>                 | Colorectal cancer              | Adherent   | Male   | McCoy's 5A (Sigma-Aldrich)<br>+ 2 mmol L-Glutamine (Gibco)<br>+ 1mM Natrium-Pyruvate (Sigma-Aldrich) | B. Vogelstein (The Johns Hopkins Oncology Center, USA) |
| <b>diploid HAP1 (dipHAP1)</b> | Chronic myeloid leukemia (CML) | Adherent   | Male   | IMDM (Sigma-Aldrich)                                                                                 | J.I. Loizou (CeMM, Austria)                            |
| <b>EEB</b>                    | Acute myeloid leukemia (AML)   | Suspension | Male   | SFEM (STEMCELL Technologies)                                                                         | Riken (RCB2345)                                        |

All culture media were supplemented with 10% FBS and 1% Penicillin-Streptomycin.

**Supplemental Table 1.** Cell lines used in this study and their culture medium.

| Cell line              | Karyotype deviations from euploidy                                                                                             |
|------------------------|--------------------------------------------------------------------------------------------------------------------------------|
| <b>parental RPE1</b>   | Segmental chr. 10q gain                                                                                                        |
| <b>RPE1 TP53 KO</b>    | Segmental chr. 10q gain                                                                                                        |
| <b>parental HME1</b>   | segmental loss of 3p, loss of chr. 4, segmental gain & loss of chr. 7q, chr. 10 isochromosome, chr. 12p gain                   |
| <b>HME1 TP53 KO</b>    | segmental gain of 3p, loss of chr. 4p, gain of chr. 4q, segmental gain & loss of chr. 7q, chr. 10 isochromosome, chr. 12p gain |
| <b>parental HAP1</b>   | Segmental chr. 15q gain                                                                                                        |
| <b>dipHAP1 TP53 KO</b> | Segmental chr. 15q gain                                                                                                        |
| <b>parental EEB</b>    | none                                                                                                                           |
| <b>EEB TP53 KO</b>     | none                                                                                                                           |
| <b>parental DLD1</b>   | Segmental chr. 2p gain                                                                                                         |
| <b>DLD1 TP53 KO</b>    | Segmental chr. 2p gain                                                                                                         |
| <b>parental HCT116</b> | Segmental gains of chromosomes 8q, 10q 16q and 17q                                                                             |
| <b>HCT116 TP53 KO</b>  | Segmental gains of chromosomes 8q, 10q, 16q and 17q, segmental 4q loss (above 1.6 threshold)                                   |

**Supplemental Table 2.** Karyotype deviations of the parental cell lines used in this study.

| Name                               | Sequence             | Reference  |
|------------------------------------|----------------------|------------|
| <b>Chromosome arm 6p deletion</b>  |                      |            |
| sgRNA 6p A                         | ACGGTTTCATTAGTCATACC | This paper |
| sgRNA 6p B                         | GGGACCGTCACCCTAATAGG | This paper |
| sgRNA 6p C                         | TGGAATATTGTTACCTTTA  | This paper |
| <b>Chromosome arm 13q deletion</b> |                      |            |
| sgRNA 13q A                        | GGGGGAGTGAATGTGAGTGA | This paper |
| sgRNA 13q B                        | ATATATGGGGTATACGTATA | This paper |
| sgRNA 13q C                        | TGGGTTACTTACCGACCGTG | This paper |
| sgRNA 13q D                        | GATAATACGATAGGCCAGTG | This paper |

**Supplemental Table 3.** sgRNAs that were used for the generation of whole or partial chromosome deletions. Further illustration in Figure S10 B.

| Name                            |     | Sequence                | Reference                      |
|---------------------------------|-----|-------------------------|--------------------------------|
| <b>Chromosome 6p deletions</b>  |     |                         |                                |
| <b>EXOC2</b>                    | fw  | ATGTCTCGATCACGACAACCC   | PrimerBank, ID:<br>30581133c1  |
|                                 | rev | GGCCAGTCCCCAGATTTTCT    |                                |
| <b>DST</b>                      | fw  | CTACCAGCACTCGAACCAGTC   | PrimerBank, ID:<br>291290967c1 |
|                                 | rev | GCCGAAGCTAATGCAAGAGTTG  |                                |
| <b>Chromosome 13q deletions</b> |     |                         |                                |
| <b>ZMYM5</b>                    | fw  | AGAGTTGACTGAACAGACTCCT  | PrimerBank ID:<br>218083691c1  |
|                                 | rev | GACCAAATGAATCCCCTATGTCC |                                |
| <b>GPC5</b>                     | fw  | GGTGTGACTGACAGTTCCCTG   | PrimerBank, ID:<br>215272348c3 |
|                                 | rev | TGCAGATAGTCTGTGGTGTGAT  |                                |
| <b>Control primer</b>           |     |                         |                                |
| <b>ALB<br/>(chr4)</b>           | fw  | TGTTGCATGAGAAAACGCCA    | Bremer et al. 2015             |
|                                 | rev | GTCGCCTGTTCAACCAAGGAT   |                                |

**Supplemental Table 4.** QPCR primers used to identify whole and partial chromosome deletions. Primer binding sites for chr. 6p and 13q are illustrated in Figure S10 B.

| Name                       | Sequence |                                   | Reference                   |
|----------------------------|----------|-----------------------------------|-----------------------------|
| <b>p53</b>                 | fw       | <u>CACCG</u> ACTTCCTGAAAACAACGTTC | Giacomelli et al. 2018      |
|                            | rev      | AAACGAAACGTTGTTTTTCAGGAAGTC       |                             |
| <b>p21</b>                 | fw       | <u>CACCGCCGCG</u> ACTGTGATGCGCTAA | McKinley and Cheeseman 2017 |
|                            | rev      | AAACTTAGCGCATCACAGTCGCGGC         |                             |
| <b>p31<sup>comet</sup></b> | fw       | <u>CACCG</u> ACTTGAGACAAGCTCTACGC | Thu et al. 2018             |
|                            | rev      | AAACGCGTAGAGCTTGTCTCAAGTC         |                             |
| <b>CDC16</b>               | fw       | <u>CACCG</u> CTCTAGATAACCGAACCC   | This paper                  |
|                            | rev      | AAACGGGTTTCGGTTATCTAGAGC          |                             |

**Supplemental Table 5.** SgRNAs used in this study for the generation of heterozygous and homozygous knockout cell lines. Underlined sequence represents added overhangs for the creation of dsDNA oligos that can be cloned into the gRNA/Cas9 plasmid, see Methods.

| Name                       | Sequence |                           |
|----------------------------|----------|---------------------------|
| <b>p53</b>                 | fw       | TTATAGGGAGGTCAAATAAGCAGCA |
|                            | rev      | ATCTACAAGCAGTCACAGCACAT   |
| <b>p21</b>                 | fw       | GCCCGGCCAGGTAACATAGTG     |
|                            | rev      | GTGACAGGTCCACATGGTCTTC    |
| <b>p31<sup>comet</sup></b> | fw       | GCGTATGTCCGAGTGCCTGC      |
|                            | rev      | GTGCTTAAGCTGTTCATAGG      |
| <b>CDC16</b>               | fw       | CTATGATCGCACCCTGAAGTCT    |
|                            | rev      | TGTCAGCATGTGATGTGATGTT    |

**Supplemental Table 6.** Genotyping primers used for the identification and analysis of generated knockout cell lines.

| Name             | Sequence                                                     |
|------------------|--------------------------------------------------------------|
| <b>Scrambled</b> | Scramble siRNA (Dharmacon/smartpool format - D-001810-10-05) |
| <b>MAD2</b>      | siMAD2 (Dharmacon/smartpool format – L-003271-00-0005)       |

**Supplemental Table 7.** SiRNA used in this study for the depletion of MAD2.

| Name                              | gRNA Sequence         | Reference                                                                                                                                      |
|-----------------------------------|-----------------------|------------------------------------------------------------------------------------------------------------------------------------------------|
| <b><i>p31<sup>comet</sup></i></b> | GCGTCGCCGCAGTGTGGGGG  | This paper, gRNAs were selected using CHOPCHOP, ( <a href="https://chopchop.cbu.uib.no">https://chopchop.cbu.uib.no</a> , (Labun et al. 2019)) |
|                                   | GCGCGGGCCCCGTGCTCAAG  |                                                                                                                                                |
|                                   | GTAACCTAGCGTAGTCACAGT |                                                                                                                                                |
| <b><i>CDC16</i></b>               | GTGGGCTTCTGGTTGCCTTG  | Horlbeck et al. 2016                                                                                                                           |

**Supplemental Table 8.** gRNAs used for the overexpression of *p31<sup>comet</sup>* and *CDC16* via CRISPRa, see Fig. S15A.

| Name                              | Sequence |                         |
|-----------------------------------|----------|-------------------------|
| <b><i>p31<sup>comet</sup></i></b> | fw       | GAGAAGTCCGAAGAACTCACG   |
|                                   | rev      | CCGAAGCGTTGAGAGGTTCC    |
| <b><i>CDC16</i></b>               | fw       | TCCTGTGTCTTGGTTTGCAG    |
|                                   | rev      | CAGAGCTTGGCTGAAGAACC    |
| <b><i>GAPDH</i></b>               | fw       | TTGACCTCAACTACATGGTTTAC |
|                                   | rev      | AGGAGGCATTGCTGATGATC    |

**Supplemental Table 9.** RT-qPCR primers used for the identification of the fold change of *p31<sup>comet</sup>* and *CDC16* in the dCas9-VPR-mCherry WT cell line, see Fig. S15C.

## References

Bremer S, Fløisand Y, Brinch L, Gedde-Dahl T, Bergan S. 2015. Glutathione Transferase Gene Variants Influence Busulfan Pharmacokinetics and Outcome After Myeloablative Conditioning. *Therapeutic Drug Monitoring* **37**: 493–500.

Giacomelli AO, Yang X, Lintner RE, McFarland JM, Duby M, Kim J, Howard TP, Takeda DY, Ly SH, Kim E, et al. 2018. Mutational processes shape the landscape of TP53 mutations in human cancer. *Nat Genet* **50**: 1381–1387.

Horlbeck MA, Gilbert LA, Villalta JE, Adamson B, Pak RA, Chen Y, Fields AP, Park CY, Corn JE, Kampmann M, et al. 2016. Compact and highly active next-generation libraries for CRISPR-mediated gene repression and activation. *eLife* **5**: e19760.

Labun K, Montague TG, Krause M, Torres Cleuren YN, Tjeldnes H, Valen E. 2019. CHOPCHOP v3: expanding the CRISPR web toolbox beyond genome editing. *Nucleic Acids Research* **47**: W171–W174.

McKinley KL, Cheeseman IM. 2017. Large-Scale Analysis of CRISPR/Cas9 Cell-Cycle Knockouts Reveals the Diversity of p53-Dependent Responses to Cell-Cycle Defects. *Developmental Cell* **40**: 405-420.e2.

Spandidos A, Wang X, Wang H, Seed B. 2010. PrimerBank: a resource of human and mouse PCR primer pairs for gene expression detection and quantification. *Nucleic Acids Research* **38**: D792–D799.

Thu KL, Silvester J, Elliott MJ, Ba-alawi W, Duncan MH, Elia AC, Mer AS, Smirnov P, Safikhani Z, Haibe-Kains B, et al. 2018. Disruption of the anaphase-promoting complex confers resistance to TTK inhibitors in triple-negative breast cancer. *Proc Natl Acad Sci USA* **115**: E1570-E1577.
